# Supplementary material
Source: PubMed Central journal article supplement (PMC3633789)
Supplement: mp201281x1.pdf [file mp201281x1.pdf]

## Supplementary Information for:

### **Pooling/Bootstrap-based GWAS (*pb*GWAS) Identifies New Loci Modifying the Age of Onset in *PSEN1* p.Glu208Ala Alzheimer's Disease**

Jorge I. Vélez<sup>1,\*</sup>, Settara C. Chandrasekharappa<sup>2</sup>, Eliana Henao<sup>3</sup>, Ariel F. Martinez<sup>1</sup>, Ursula Harper<sup>2</sup>, MaryPat Jones<sup>2</sup>, Benjamin D. Solomon<sup>1</sup>, Liliana Lopez<sup>3</sup>, Gloria Garcia<sup>3</sup>, Daniel Camilo Aguirre-Acevedo<sup>3</sup>, Natalia Acosta-Baena<sup>3</sup>, Juan Carlos Correa<sup>4</sup>, Carlos Mario Lopera-Gómez<sup>4</sup>, Mario César Jaramillo-Elorza<sup>4</sup>, Dora Rivera<sup>3</sup>, Kenneth S. Kosik<sup>5</sup>, Nicholas J. Schork<sup>6</sup>, James M. Swanson<sup>7,8</sup>, Francisco Lopera<sup>3,\*</sup>, and Mauricio Arcos-Burgos<sup>1,3,9,#</sup>

<sup>1</sup> Medical Genetics Branch, National Human Genome Research Institute, National Institutes of Health, Bethesda, MD, USA.

<sup>2</sup> Genome Technology Branch, National Human Genome Research Institute, National Institutes of Health, Bethesda, MD, USA.

<sup>3</sup> Grupo de Neurociencias de Antioquia, Facultad de Medicina, Universidad de Antioquia, Medellín, Colombia.

<sup>4</sup> Escuela de Estadística, Universidad Nacional de Colombia, Sede Medellín, Medellín, Colombia.

<sup>5</sup> Neuroscience Research Institute, University of California at Santa Barbara, Santa Barbara, CA, USA.

<sup>6</sup> Department of Biostatistics and Bioinformatics, The Scripps Research Institute, La Jolla, CA, USA.

<sup>7</sup> Department of Psychiatry, Florida International University, Miami, FL, USA.

<sup>8</sup> Child Development Center, University of California at Irvine, Irvine, CA, USA.

<sup>9</sup> Translational Genomics Group, Department of Translational Medicine, John Curtin School of Medical Research, ANU College of Medicine, Biology & Environment, The Australian National University, Canberra, ACT, Australia.

\*These authors contributed equally to this work.

#### **# Correspondence to be directed to:**

Mauricio Arcos-Burgos, M.D., Ph.D.

Associate Professor and Group Leader

Translational Genomics Group

ANU College of Medicine, Biology & Environment

John Curtin School of Medical Research,

The Australian National University,

Building 131 Garran Road,

Office 3.091, Tel: +61 2 61259396

Canberra, ACT, 0200, Australia.

e-mail: [Mauricio.arcos-burgos@anu.edu.au](mailto:Mauricio.arcos-burgos@anu.edu.au)

## SUPPLEMENTARY METHODS

### An Alternative Empirical Method to Determine Rates of Type I Error

**Probability.** Suppose that  $m$  independent tests of the same type are applied e.g. allelic frequencies for  $m$  SNPS are compared between cases and controls; denote  $P_i$  the  $P$ -value for the  $i$ -th hypothesis,  $i=1,2,\dots,m$ . Under the common null hypothesis,  $P_1, P_2,\dots,P_m$  is a random sample of size  $m$  following a  $U(0,1)$  distribution. Let  $V$  be a random variable with cumulative distribution function (cdf)  $F$ , and  $V_{(m)} = \max\{V_1, V_2,\dots,V_m\}$  be the maximum in a random sample of size  $m$ . The exact distribution of  $V_{(m)}$  is given by:

$$P(V_{(m)} < t) = \{F(t)\}^m \quad (1)$$

(Casella & Berger, 2001), Note that if  $F$  is unknown, calculation of (1) is impossible. Using asymptotic theory, we used the alternative method described by Serfling (1990, pp. 89): as  $m \rightarrow \infty$  (e.g., several hundred thousands of tests are performed), seems intuitive to derive an empirical test to evaluate significant  $P$ -values for a fixed type I error probability  $\alpha$ . Thus far, consider the random variable:

$$D_m = (V_{(m)} - a_m)/b_m \quad (2)$$

for some constants:  $\{a_m\}$  and  $\{b_m\}$ , the limiting distribution of (2) has one of three forms (Serfling, 1980; pp. 89). Since  $V_1 = -\log(P_1)$ ,  $V_2 = -\log(P_2)$ , ...,  $V_m = -\log(P_m) \sim$  Exponential (1) (Devroye, 1986), by choosing  $a_m = \log(m)$  and  $b_m = 1$  it follows that

$$P(V_{(m)} - \log(m) < t) \rightarrow \exp\{-\exp(-t)\}, \quad -\infty < t < \infty, \quad m \rightarrow \infty \quad (3)$$

(Serfling, 1980; pp. 90). Now, let  $t_c$  be the critical value, e.g.

$$P(V_{(m)} - \log(m) < t_c) = \alpha \quad (4)$$

If (3) and (4) are combined we have:

$$t_c = -\log(-\log(1 - \alpha)) \quad (5)$$

Thus far, those  $P$ -values for which the transformation  $h(x) = -\log(-\log(1-x))$  is greater than (4) are said to be significant. We implemented this procedure in R (R Development Core Team, 2011), considering different scenarios, e.g. different  $n$  values for cases and controls, markers and number of steps, and it was applied to the  $P$ -values generated by our *pbGWAS* strategy. Results are presented in Supplementary Figures 4-8, and Supplementary Table 1.

## SUPPLEMENTARY FIGURES.

### Supplementary Figure 1

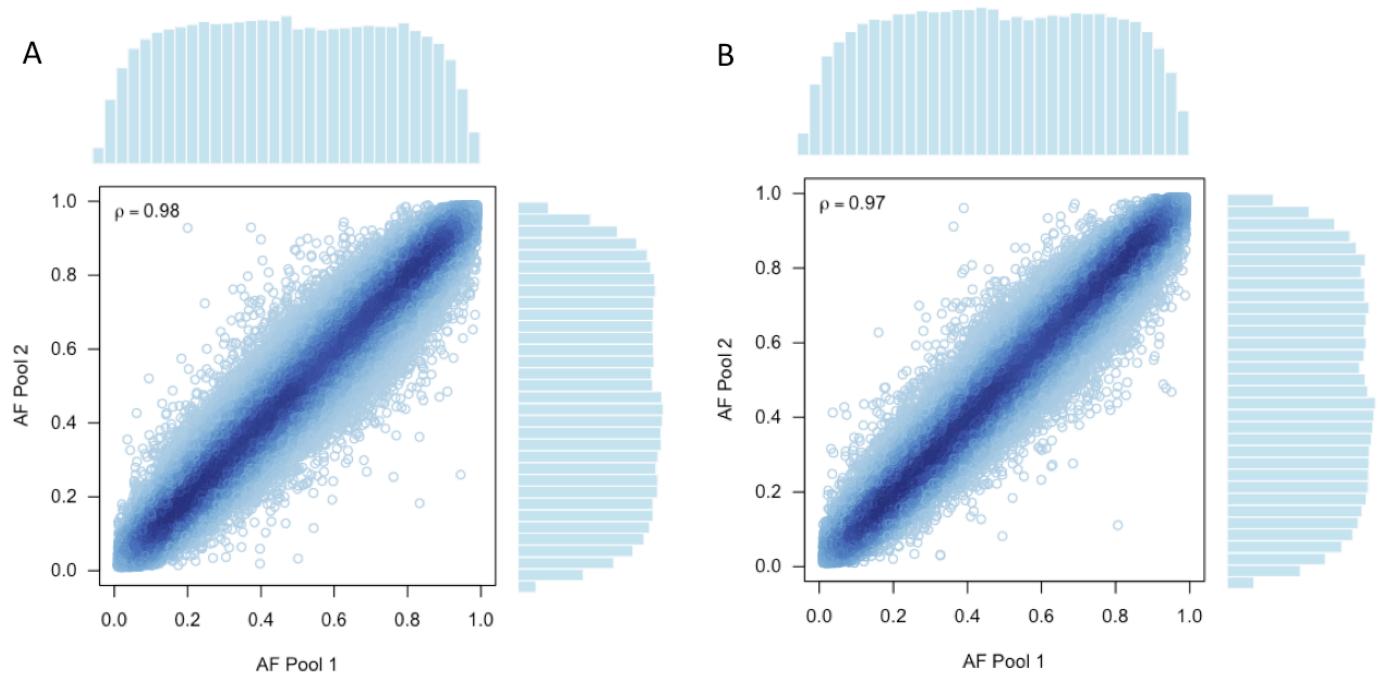

Scatter plots, correlation analyses, and histograms for the allele frequencies (AFs) obtained for two technical replicates using our *pbGWAS* strategy. Panel **A** depicts the results for the group of cases and **B** for the controls. In there, dots represent estimated AFs for each SNP; the x-axis corresponds to the AFs for the first replicate and the y-axis for the second replicate. Vertical (top) and horizontal (right) bars correspond to the histograms for the AFs in Pools 1 and 2, respectively. Comparison of the AF density distribution functions within each group using R (R Development Core Team, 2011) and the *sm* package (Bowman & Azzalini, 2010) with  $B=100$  replicates shows that these are statistically equivalent (cases:  $P=0.36$ ; controls:  $P=0.11$ ).

## Supplementary Figure 2

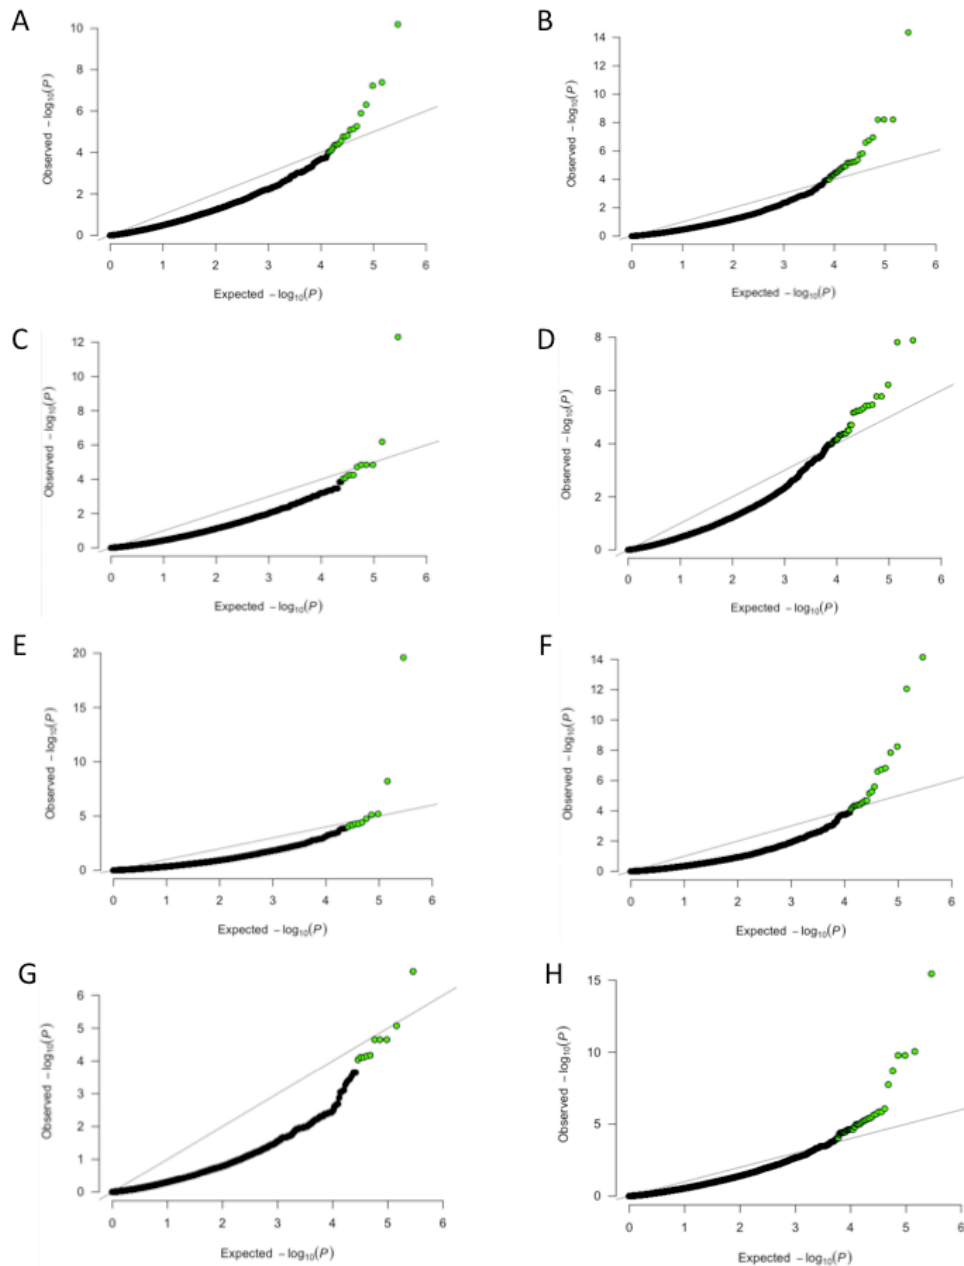

Quantile-quantile plots for observed versus expected FDR-corrected  $-\log_{10}(P)$  values for each of eight pairs (from **A** to **H**, respectively) of DNA pools generated via bootstrap as described in our *pbGWAS* strategy. In these plots, dots represent the  $-\log_{10}(P)$  values for 287,368 single nucleotide polymorphisms (SNPs); green dots correspond to those SNPs for which the  $-\log_{10}(P)$  is greater than four, e.g.,  $P < 10^{-4}$ . FDR = False Discovery Rate.

### Supplementary Figure 3

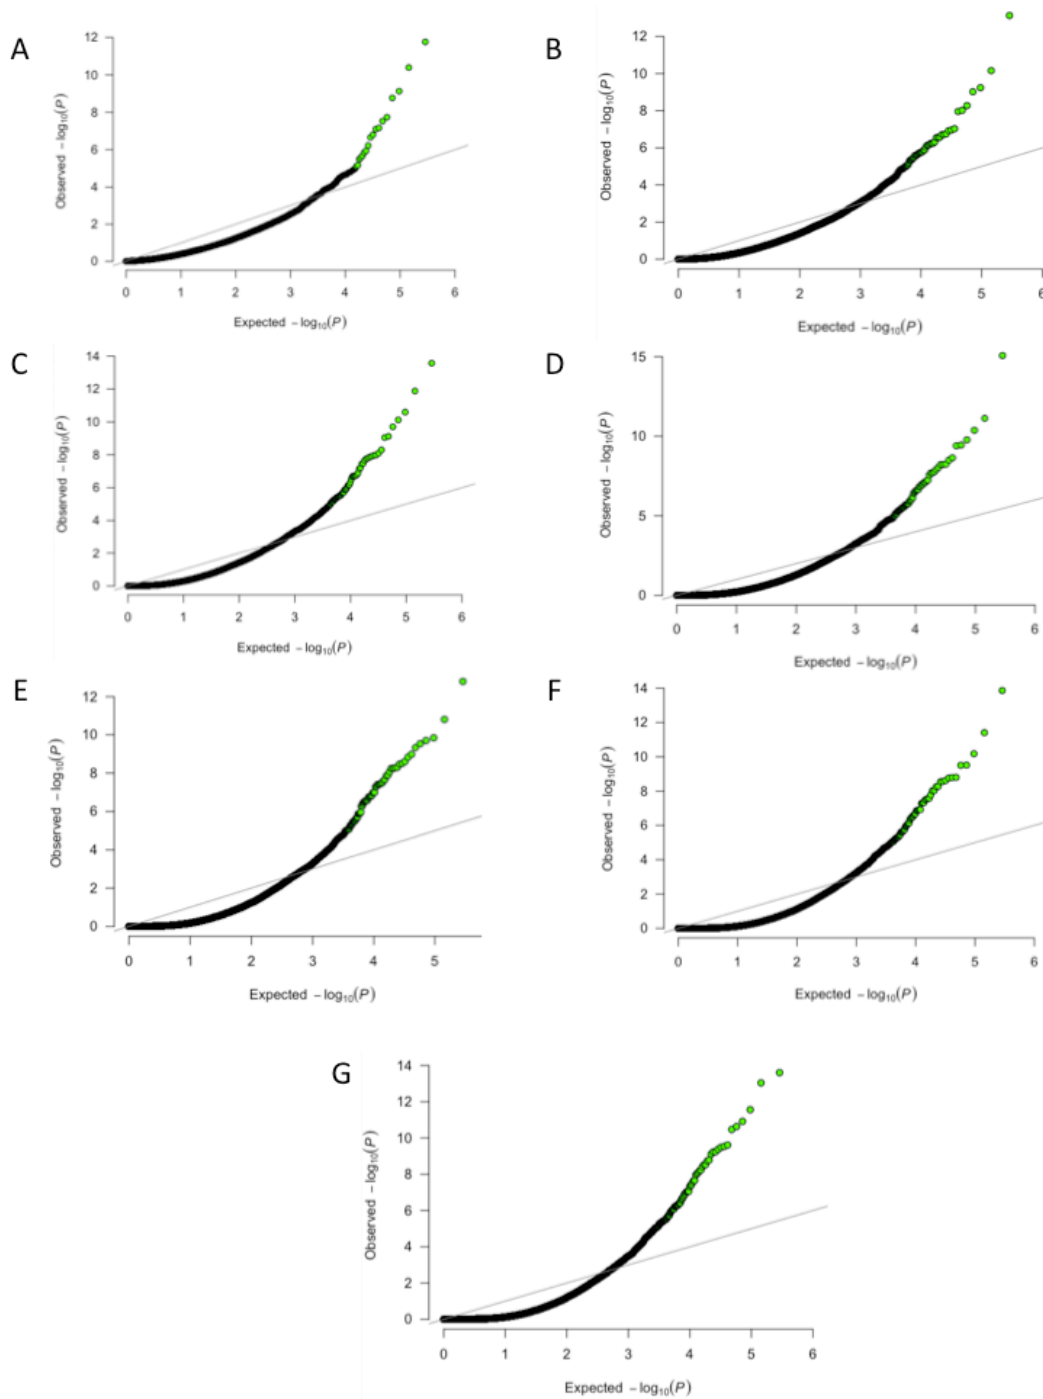

Quantile-quantile plots for observed versus expected FDR-corrected  $-\log_{10}(P)$  values after combining the  $P$ -values from **(A)** steps 1 to 2, **(B)** 1 to 3, **(C)** 1 to 4, **(D)** 1 to 5, **(E)** 1 to 6, **(F)** 1 to 7 and **(G)** 1 to 8 using the Stouffer's method as described in our *pbGWAS* strategy (Figure 1). Abbreviations and conventions as in Supplementary Figure 2.

## Supplementary Figure 4

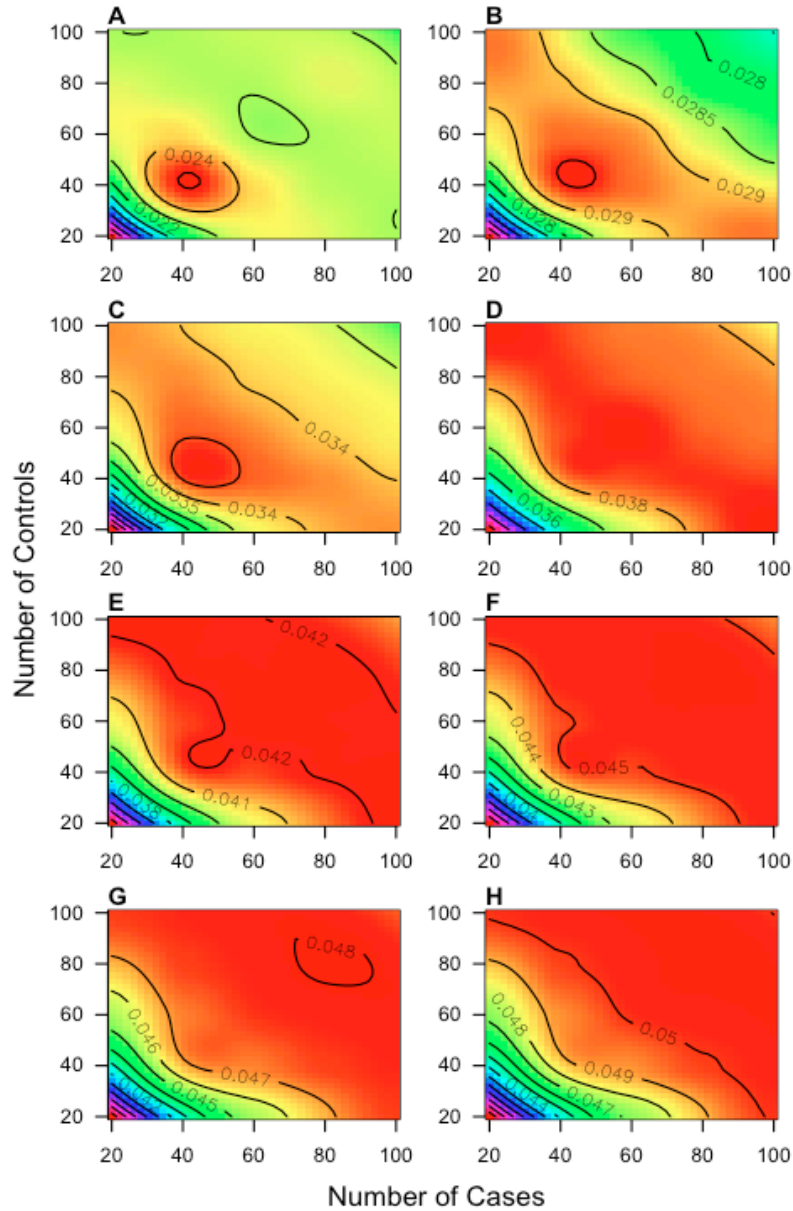

Contour plots for rejection rates of  $H_0$  for allele frequencies that do not differ between cases and controls when a *pb*GWAS strategy is used;  $m=1,000$  SNPs. Stouffer's method was used to combine the  $P$ -values (see Materials and Methods and Figure 1 of the main manuscript) from (A) step 1, (B) 1 to 2, (C) 1 to 3, (D) 1 to 4, (E) 1 to 5, (F) 1 to 6, (G) 1 to 7 and (H) 1 to 8. The x and y axes represent the total number of DNA samples available from cases and controls, respectively. The type I error probability was fixed at  $\alpha=0.05$ . High rejection rates are represented in red.

## Supplementary Figure 5

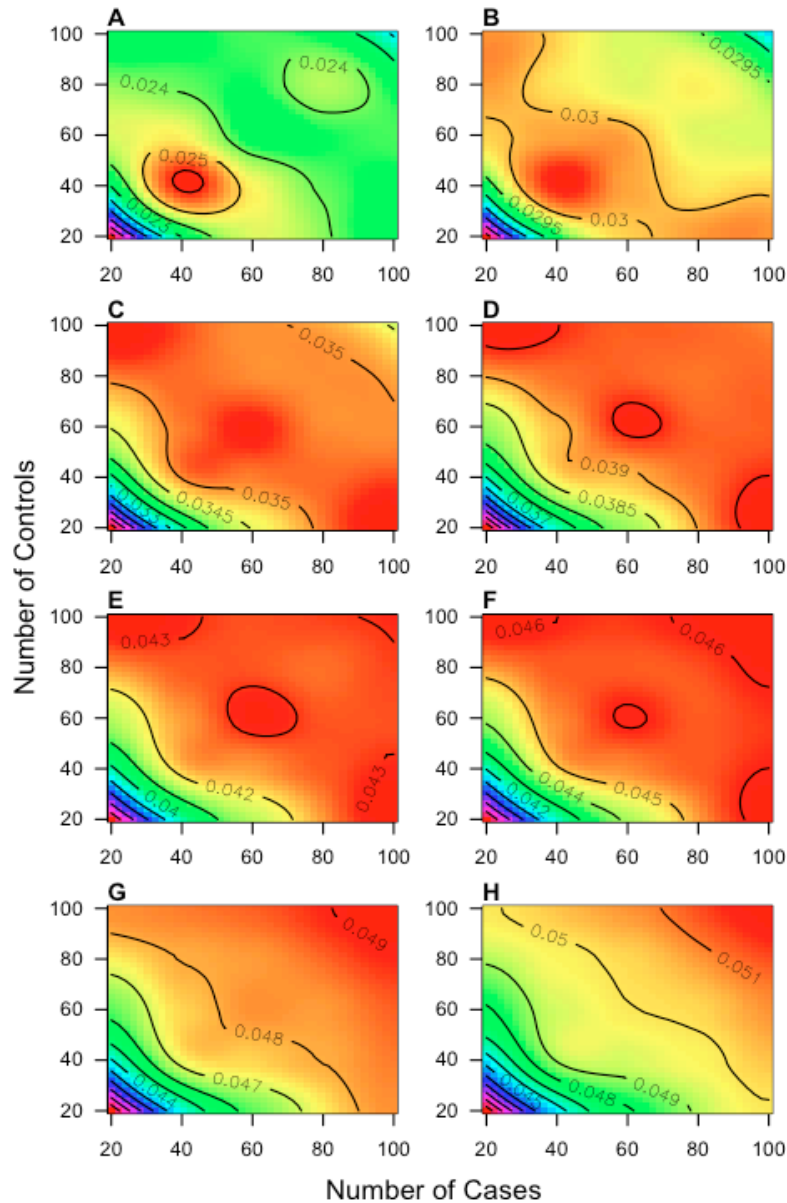

Contour plots for rejection rates of  $H_0$  for allele frequencies that do not differ between cases and controls when a *pb*GWAS strategy is used;  $m=10,000$  SNPs. Stouffer's method was used to combine the  $P$ -values (see Materials and Methods and Figure 1 of the main manuscript) from (A) step 1, (B) 1 to 2, (C) 1 to 3, (D) 1 to 4, (E) 1 to 5, (F) 1 to 6, (G) 1 to 7 and (H) 1 to 8. The x and y axes represent the total number of DNA samples available from cases and controls, respectively. The type I error probability was fixed at  $\alpha=0.05$ . High rejection rates are represented in red.



## Supplementary Figure 6

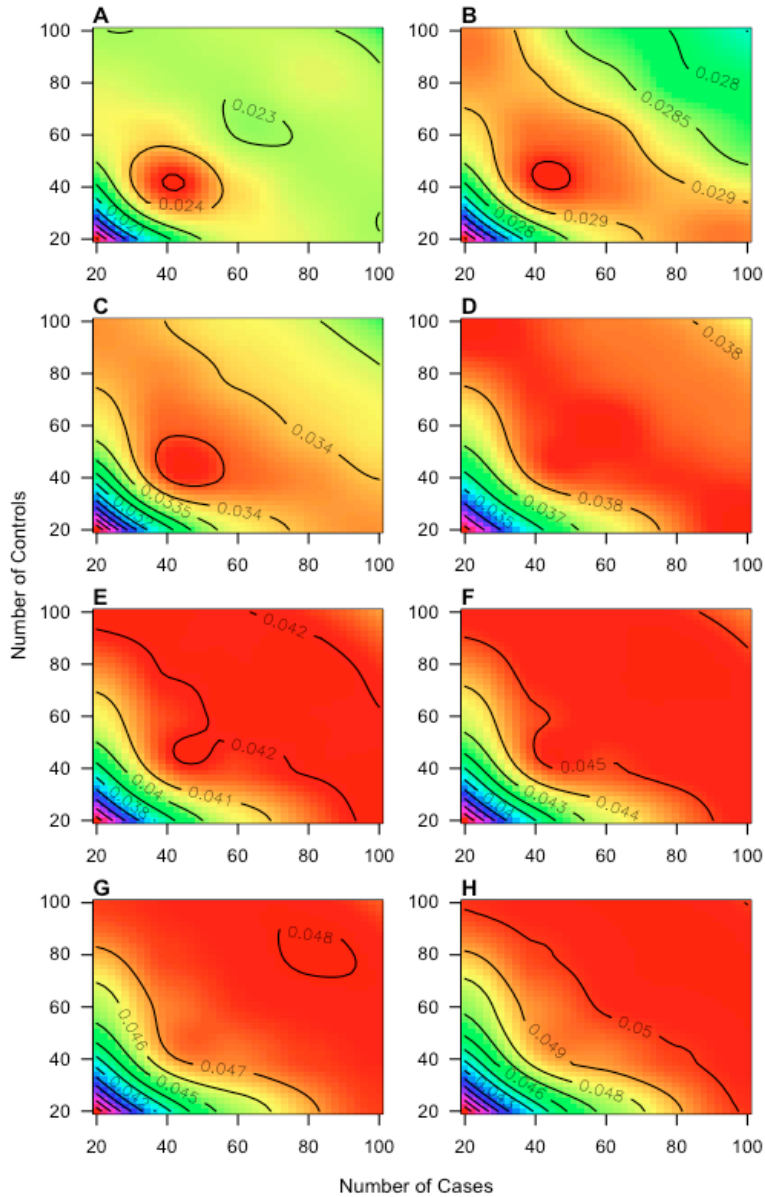

Contour plots for rejection rates of  $H_0$  for allele frequencies that do not differ between cases and controls when a *pbGWAS* strategy is used;  $m=100,000$  SNPs. Stouffer's method was used to combine the  $P$ -values (see Materials and Methods and Figure 1 of the main manuscript) from **(A)** step 1, **(B)** 1 to 2, **(C)** 1 to 3, **(D)** 1 to 4, **(E)** 1 to 5, **(F)** 1 to 6, **(G)** 1 to 7 and **(H)** 1 to 8. The x and y axes represent the total number of DNA samples available from cases and controls, respectively. The type I error probability was fixed at  $\alpha=0.05$ . High rejection rates are represented in red.

## Supplementary Figure 7

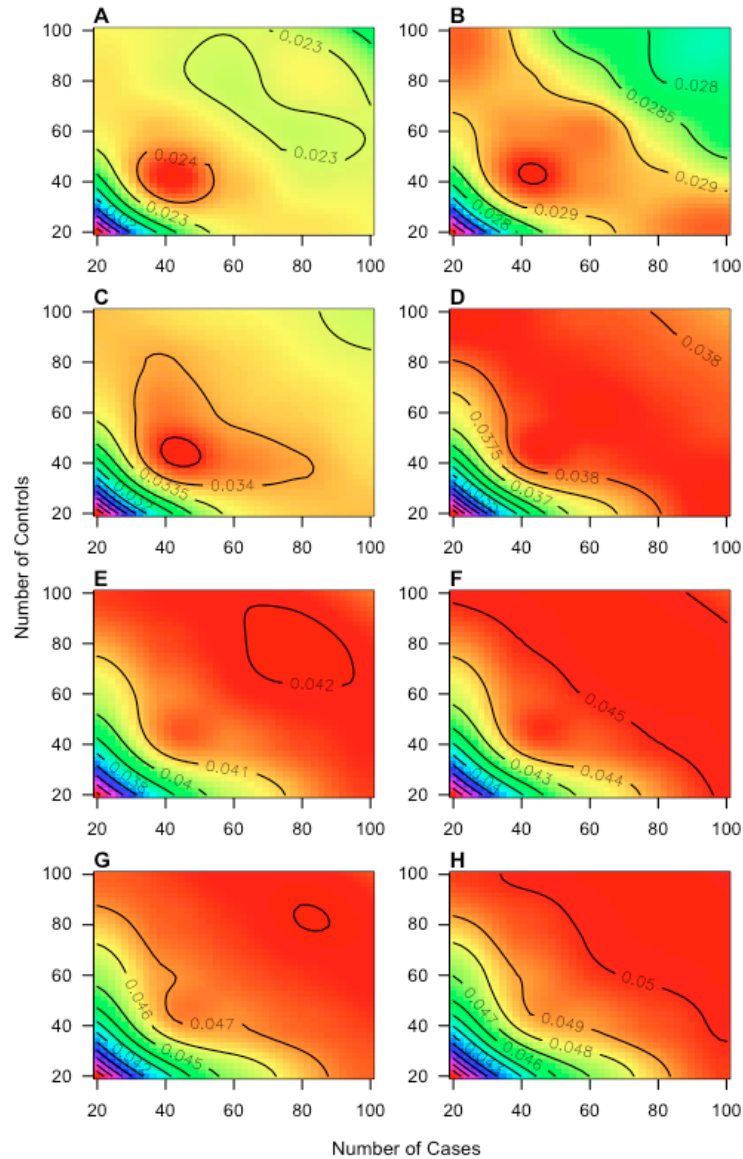

Contour plots for rejection rates of  $H_0$  for allele frequencies that do not differ between cases and controls when a *pbGWAS* strategy is used;  $m=300,000$  SNPs. Stouffer's method was used to combine the  $P$ -values (see Materials and Methods and Figure 1 of the main manuscript) from (A) step 1, (B) 1 to 2, (C) 1 to 3, (D) 1 to 4, (E) 1 to 5, (F) 1 to 6, (G) 1 to 7 and (H) 1 to 8. The  $x$  and  $y$  axes represent the total number of DNA samples available from cases and controls, respectively. The type I error probability was fixed at  $\alpha=0.05$ . High rejection rates are represented in red.

## Supplementary Figure 8

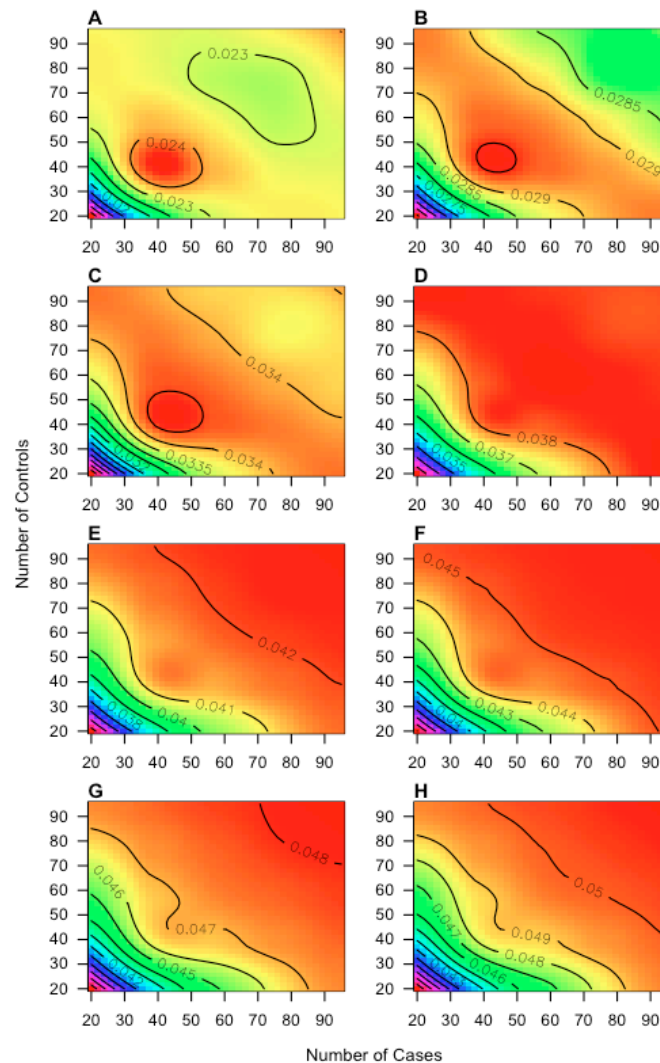

Contour plots for rejection rates of  $H_0$  for allele frequencies that do not differ between cases and controls when a *pb*GWAS strategy is used;  $m=500,000$  SNPs. Stouffer's method was used to combine the  $P$ -values (see Materials and Methods and Figure 1 of the main manuscript) from **(A)** step 1, **(B)** 1 to 2, **(C)** 1 to 3, **(D)** 1 to 4, **(E)** 1 to 5, **(F)** 1 to 6, **(G)** 1 to 7 and **(H)** 1 to 8. The x and y axes represent the total number of DNA samples available from cases and controls, respectively. The type I error probability was fixed at  $\alpha=0.05$ . High rejection rates are represented in red.

### Supplementary Figure 9.

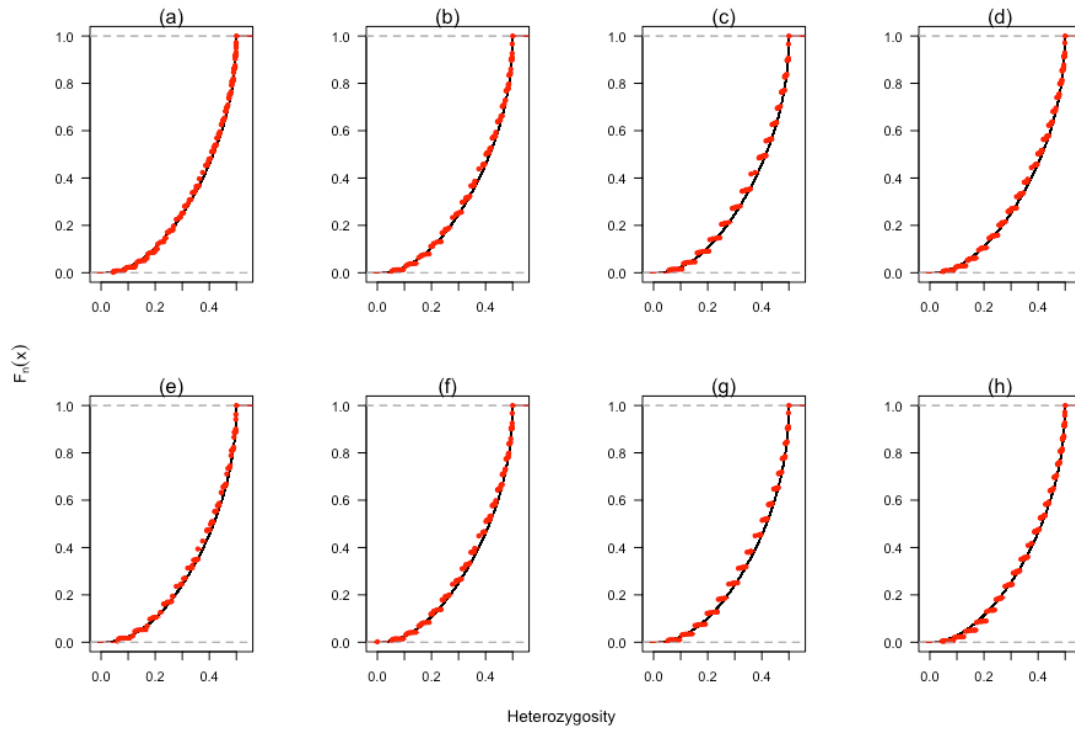

Cumulative distribution function of the heterozygosity values in cases and controls for individual genotyping (red dots) and DNA pooling (black dots).

## Supplementary Figure 10.

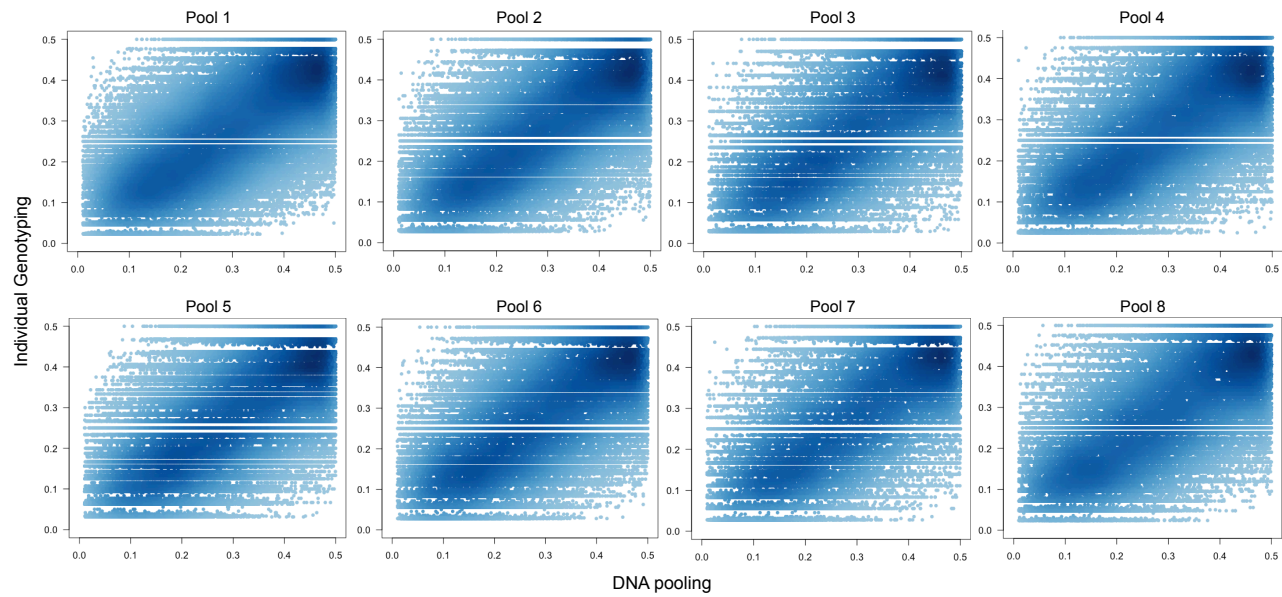

Pattern of correlation that was found between gene frequencies estimated by DNA pooling and defined by individual genotyping for cases.

## Supplementary Figure 11.

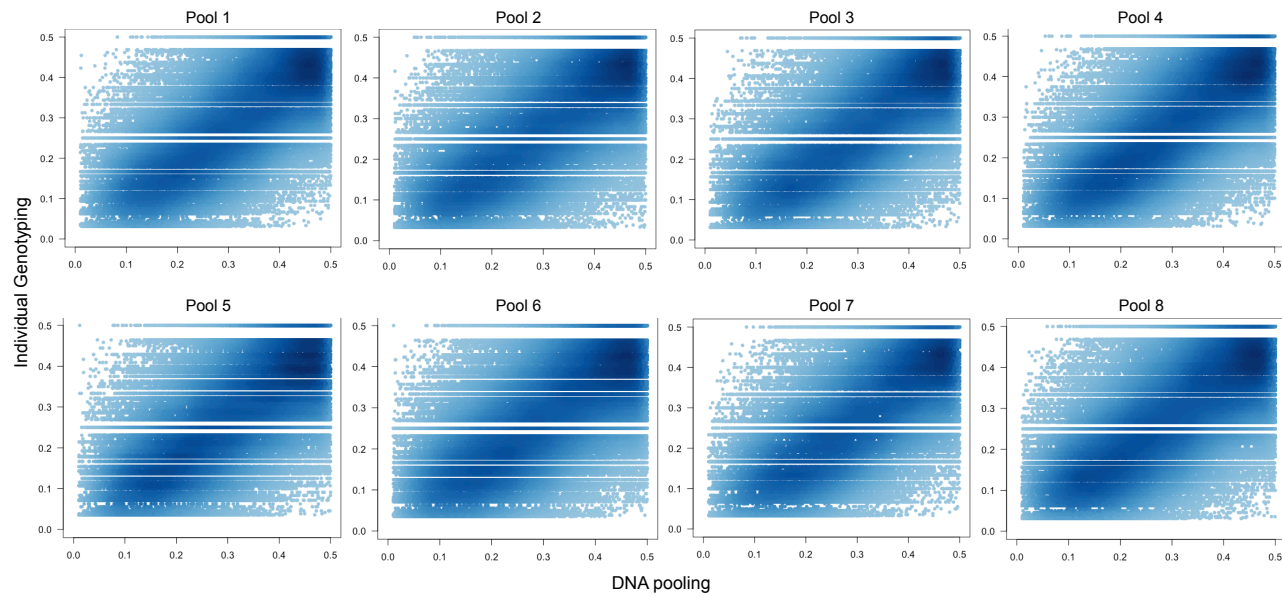

Pattern of correlation that was found between gene frequencies estimated by DNA pooling and defined by individual genotyping for controls.

**Supplementary Table 1.** Simulation-based  $H_0$  rejections rates when no difference in the allele frequencies between cases and controls is present. For calculation purposes, Type I error probability was fixed at  $\alpha=0.05$ .

| Number of SNPs | DNA samples |          | Rejection Rate of $H_0$ in <i>pbGWAS</i> |        |        |        |        |        |        |        |
|----------------|-------------|----------|------------------------------------------|--------|--------|--------|--------|--------|--------|--------|
|                | Cases       | Controls | S1                                       | S1-2   | S1-3   | S1-4   | S1-5   | S1-6   | S1-7   | S1-8   |
| 100,000        | 20          | 20       | 0.0123                                   | 0.0238 | 0.0268 | 0.0300 | 0.0316 | 0.0335 | 0.0346 | 0.0353 |
| 100,000        | 25          | 25       | 0.0241                                   | 0.0298 | 0.0337 | 0.0365 | 0.0396 | 0.0409 | 0.0426 | 0.0437 |
| 100,000        | 30          | 30       | 0.0208                                   | 0.0260 | 0.0308 | 0.0355 | 0.0386 | 0.0411 | 0.0431 | 0.0445 |
| 100,000        | 35          | 35       | 0.0285                                   | 0.0306 | 0.0352 | 0.0388 | 0.0423 | 0.0448 | 0.0468 | 0.0484 |
| 100,000        | 40          | 40       | 0.0209                                   | 0.0299 | 0.0344 | 0.0373 | 0.0400 | 0.0430 | 0.0450 | 0.0471 |
| 100,000        | 45          | 45       | 0.0266                                   | 0.0290 | 0.0341 | 0.0384 | 0.0423 | 0.0456 | 0.0476 | 0.0494 |
| 100,000        | 50          | 50       | 0.0208                                   | 0.0271 | 0.0344 | 0.0373 | 0.0409 | 0.0440 | 0.0465 | 0.0488 |
| 100,000        | 55          | 55       | 0.0251                                   | 0.0310 | 0.0347 | 0.0399 | 0.0492 | 0.0460 | 0.0485 | 0.0509 |
| 300,000        | 20          | 20       | 0.0123                                   | 0.0241 | 0.0271 | 0.0301 | 0.0319 | 0.0336 | 0.0346 | 0.0354 |
| 300,000        | 25          | 25       | 0.0241                                   | 0.0299 | 0.0337 | 0.0363 | 0.0395 | 0.0408 | 0.0425 | 0.0436 |
| 300,000        | 30          | 30       | 0.0208                                   | 0.0265 | 0.0313 | 0.0357 | 0.0385 | 0.0408 | 0.0426 | 0.0441 |
| 500,000        | 20          | 20       | 0.0123                                   | 0.0234 | 0.0265 | 0.0296 | 0.0316 | 0.0334 | 0.0348 | 0.0356 |
| 500,000        | 25          | 25       | 0.0241                                   | 0.0299 | 0.0336 | 0.0363 | 0.0395 | 0.0408 | 0.0425 | 0.0436 |

**Supplementary Table 2.** number of DNA samples used in each step of the *pbGWAS* strategy that also were individually genotyped

| Phenotype | Pool |    |    |    |    |    |    |    |
|-----------|------|----|----|----|----|----|----|----|
|           | 1    | 2  | 3  | 4  | 5  | 6  | 7  | 8  |
| EOAD      | 18   | 18 | 17 | 20 | 16 | 18 | 18 | 21 |
| LOAD      | 15   | 15 | 16 | 16 | 14 | 14 | 15 | 16 |
| Total     | 33   | 33 | 33 | 36 | 30 | 32 | 33 | 37 |

**Supplementary Table 3.** Estimated linear correlation coefficients ( $\rho$ ) and 95% confidence intervals (CI) when the heterozygosity values obtained with DNA pooling and individual genotyping for EOAD and LOAD patients are plotted against each other.

| Pool | Cases  |                  | Controls |                  |
|------|--------|------------------|----------|------------------|
|      | $\rho$ | 95% CI           | $\rho$   | 95% CI           |
| 1    | 0.6434 | (0.6412, 0.6456) | 0.6412   | (0.6390, 0.6433) |
| 2    | 0.6480 | (0.6459, 0.6502) | 0.6130   | (0.6106, 0.6153) |
| 3    | 0.6352 | (0.6330, 0.6374) | 0.6407   | (0.6385, 0.6429) |
| 4    | 0.6458 | (0.6436, 0.6480) | 0.6520   | (0.6498, 0.6541) |
| 5    | 0.6408 | (0.6386, 0.6430) | 0.6202   | (0.6179, 0.6224) |
| 6    | 0.6515 | (0.6493, 0.6536) | 0.5994   | (0.5970, 0.6017) |
| 7    | 0.6558 | (0.6537, 0.6579) | 0.6448   | (0.6426, 0.6469) |
| 8    | 0.6393 | (0.6371, 0.6415) | 0.6176   | (0.6153, 0.6199) |



## REFERENCES

1. Bowman, A. W. and Azzalini, A. (2010). R package 'sm': nonparametric smoothing methods (version 2.2-4) URL <http://www.stats.gla.ac.uk/~adrian/sm>, [http://azzalini.stat.unipd.it/Book\\_sm](http://azzalini.stat.unipd.it/Book_sm)
2. Casella, G. and Berger, R.L. (2001). *Statistical Inference*. Duxbury Press.
3. Devroye, L. (1986). *Non-Uniform Random Variate Generation*. New York: Springer-Verlag.
4. Murdoch, D.J., Tsai, Y.L., Adcock, J. (2008). *P-values are random variables*. *The American Statistician*, August 2008, Vol. 62, No. 3, pp. 242-245.
5. R Development Core Team (2011). R: A language and environment for statistical computing. R Foundation for Statistical Computing, Vienna, Austria. ISBN 3-900051-07-0, URL <http://www.R-project.org/>
6. Sackrowitz, H. and Samuel-Cahn, E. (1999). *P-values as Random Variables-Expected P-values*. *The American Statistician*, Vol. 53, No. 4, pp. 326-331.
